# Supplementary material for: Facile amidinations of 2-aminophenylboronic acid promoted by boronate ester formation
Source: Royal Society of Chemistry journal article supplement (doi:10.1039/c8ob02696c), 2019-01-01

## Facile amidinations of 2-aminophenylboronic acid promoted by boronate ester formation

Brighid B. Pappin, Taylor A. Garget, Peter C. Healy, Michela I. Simone, Milton J. Kiefel\* and Todd A. Houston\*

### General Experimental Methods:

Acetonitrile was distilled prior to use. All chemicals were purchased as reagent grade and used without further purification with the exception that 2-amino phenylboronic acid **1** (Alfa Aesar) was recrystallised from MeOH/H<sub>2</sub>O before use. <sup>1</sup>H and <sup>13</sup>C NMR spectra were obtained using a Bruker spectrometer (400 MHz). Signals are reported in terms of their chemical shift (δ in ppm) relative to DMSO (<sup>1</sup>H, 2.50 and <sup>13</sup>C, 39.5) and *J* coupling constants are in hertz (Hz). For <sup>1</sup>H spectra, multiplicity, integration, intensity, coupling constants and assignment values are reported. Multiplicities are indicated using standard notation; singlet (s), doublet (d), doublet of doublets (dd), triplet (t) and multiplet (m). Mass spectral analysis (MS) was performed using a Bruker Esquire 3000 electrospray ionisation mass spectrometer. IUPAC names are derived from structures where B-N interactions are treated as dative bonds (non-covalent) for all compounds.

### General Method A for amidination of 2-aminophenylboronic acid (**1**):

To a neat solution of nitrile (2 mL), salicylic acid (10 mg, 0.072 mmol) and **1** as free base (9.9 mg, 0.072 mmol) were added and stirred at 343 K for 2 hours under argon, monitoring via TLC (DCM:MeOH, 10:1, R<sub>f</sub> 0.28 for **5**). The reaction mixture was then allowed to crystallise out of solution to give the desired amidine product as crystalline solid in most cases. The yields listed for compounds **5-7** below are isolated yields using this method.

### General Method B for amidination of 2-aminophenylboronic acid (**1**):

2-aminophenylboronic acid **1** (9.9 mg, 0.072 mmol) was dissolved in dry CHCl<sub>3</sub> (4 ml) in a glass round bottom by stirring under argon. Salicylic acid (10 mg, 0.072 mmol) was added and left to stir for 1 hour during which time a white precipitate formed. The sample was filtered to collect 17.5 mg a white solid. ESMS +ve ion mode (MeOH): *m/z* observed 261.6, calculated [M+Na<sup>+</sup>] 262.06, Boron Isotopes: <sup>10</sup>B 22% and <sup>11</sup>B 78%.

This sample was left under high vacuum for 24 hours before it was dissolved in nitrile under argon and heated at 303 K for 4 hours. Percent conversion was estimated by NMR integration of the amidine NH proton peaks relative to the total aromatic proton peaks (including both **1** and product) in DMSO-*d*<sub>6</sub> solvent.

Catechol and salicylate esters of (2-acetimidamidophenyl)boronic acid:

Yield 33% and 68% (respectively). Clear crystalline solids.

Catechol ester:  $^1\text{H}$  NMR (400 MHz, DMSO):  $\delta$  2.30 (s, 3H,  $\text{CH}_3$ ), 6.50 (m, 4H, ArH), 6.99 (m, 2H, ArH), 7.30 (m, 2H, ArH), 9.19 (s, 1H, NH), 11.04 (s, 1H, C=NH) ppm. ESMS ( $m/z$ ) [ $\text{M}-\text{H}^+$ ] observed 250.5, calculated [ $\text{C}_{14}\text{H}_{12}\text{BN}_2\text{O}_2$ ] 251.07. Boron isotopes:  $^{10}\text{B}$  23.6% and  $^{11}\text{B}$  76.4%.

Crystal data for  $\text{C}_{14}\text{H}_{13}\text{BN}_2\text{O}_2\cdot\text{H}_2\text{O}$  (1118th21):  $M = 270.1$ , monoclinic, space group  $\text{P}2_1/\text{c}$ ,  $a = 7.0763(5)$ ,  $b = 9.3343(7)$ ,  $c = 20.5929(14)$  Å,  $\beta = 92.821(7)^\circ$ ,  $U = 1358.6(2)$  Å $^3$ ,  $Z = 4$ ,  $D_c = 1.32$  g cm $^{-3}$ ,  $\mu = 0.092$  mm $^{-1}$ , Crystal size: 0.47 x 0.37 x 0.34 mm.  $T_{\text{min/max}} = 0.97, 1.00$ . 8052 reflections collected, 3760 unique ( $R_{\text{int}} = 0.025$ ),  $R = 0.054$  [2877 reflections with  $I > 2s(I)$ ],  $wR^2 = 0.185$  (all data). CCDC#1848684. IUPAC name: *N*-(2-(benzo[d][1,3,2]dioxaborol-2-yl)phenyl)acetimidamide.

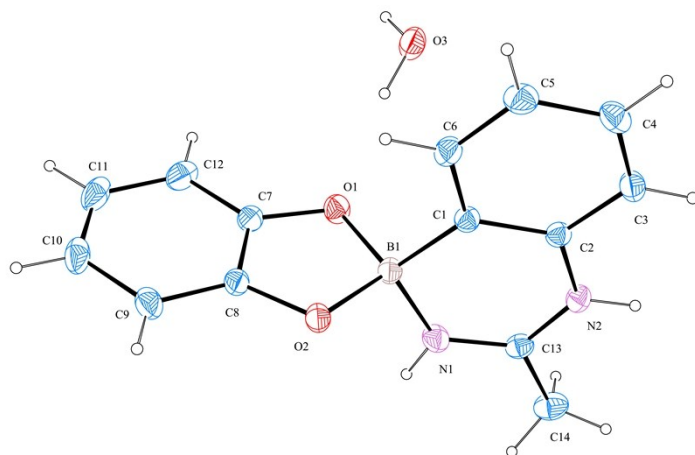

Salicylate ester (**5**):  $^1\text{H}$  NMR (400 MHz, DMSO):  $\delta$ : 2.33 (s, 3H,  $\text{CH}_3$ ), 6.76 (dd,  $J = 8.2, 1.0$  Hz, 1H, ArH), 6.86 (td,  $J = 7.5, 1.1$  Hz, 1H, ArH), 7.08 (m, 2H, ArH), 7.29 (t,  $J = 7.4$  Hz, 2H), 7.40 (ddd,  $J = 8.3, 7.2, 1.8$  Hz, 1H), 7.78 (dd,  $J = 7.7, 1.8$  Hz, 1H), 9.38 (s, 1H, NH), 11.16 (s, 1H, C=NH) ppm.

Crystal data for  $\text{C}_{15}\text{H}_{13}\text{BN}_2\text{O}_3$  (1110th19):  $M = 280.1$ , monoclinic, space group  $\text{P}2_1/\text{c}$ ,  $a = 11.2723(8)$ ,  $b = 11.6971(6)$ ,  $c = 10.6896(6)$  Å,  $\beta = 101.099(6)^\circ$ ,  $U = 1383.1(2)$  Å $^3$ ,  $Z = 4$ ,  $D_c = 1.34$  g cm $^{-3}$ ,  $\mu = 0.094$  mm $^{-1}$ , Crystal size: 0.35 x 0.25 x 0.15 mm.  $T_{\text{min/max}} = 0.99, 1.00$ . 6482 reflections collected, 3718 unique ( $R_{\text{int}} = 0.027$ ),  $R = 0.058$  [2422 reflections with  $I > 2s(I)$ ],  $wR^2 = 0.174$  (all data). CCDC#1848682. IUPAC name: *N*-(2-(4-oxo-4H-benzo[d][1,3,2]dioxaborinin-2-yl)phenyl)acetimidamide.

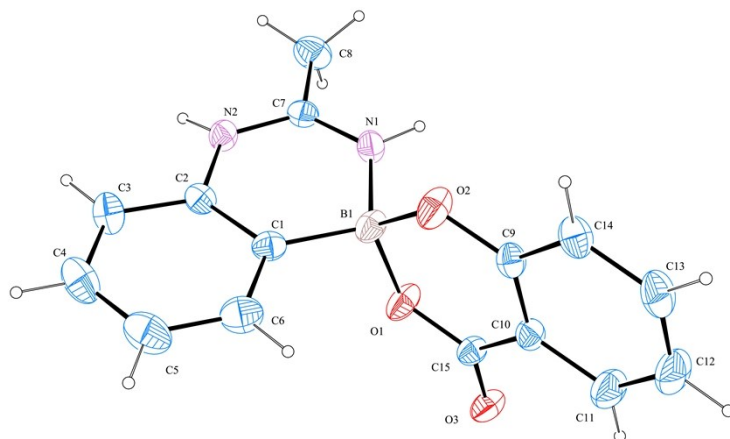

Proton- and C13-NMR of catechol ester of (2-acetimidamidophenyl)boronic acid:

BP1244.116.fid  
BP1244.91.CRY.CATE  
DMSO  
EXP #116-117

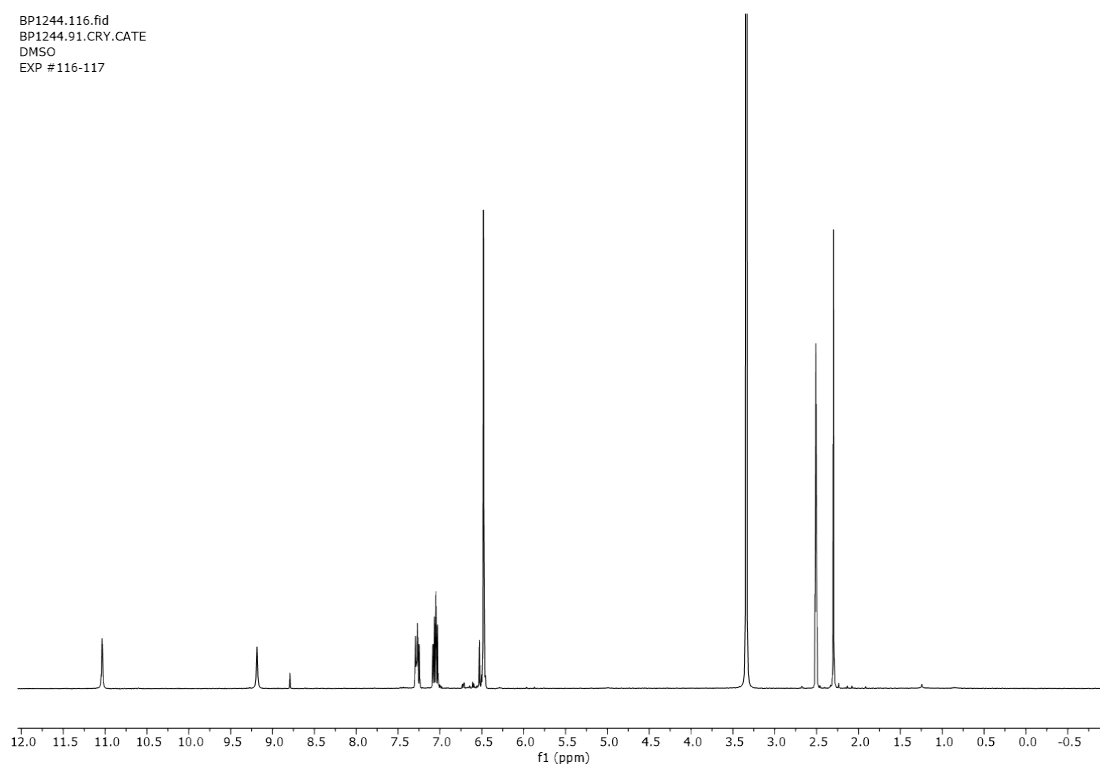

BP1244.117.fid  
BP1244.91.CRY.CATE  
DMSO  
EXP #116-117

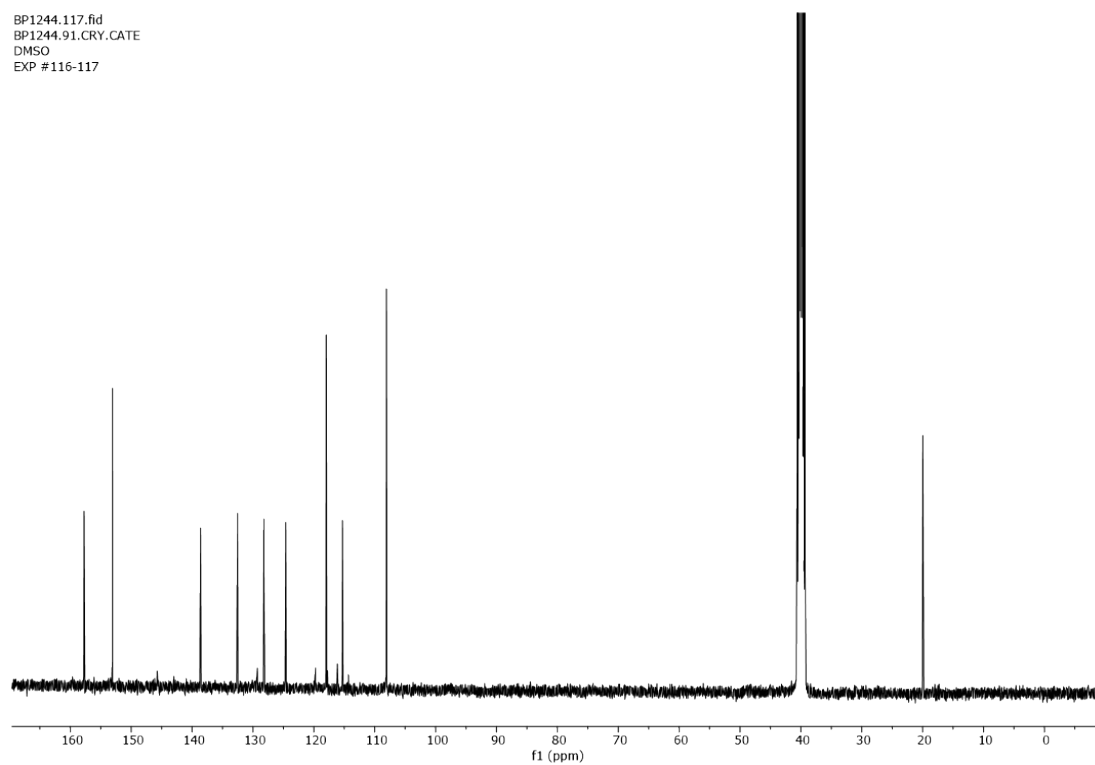

Proton NMR of salicylate ester of (2-acetimidamidophenyl)boronic acid (5):

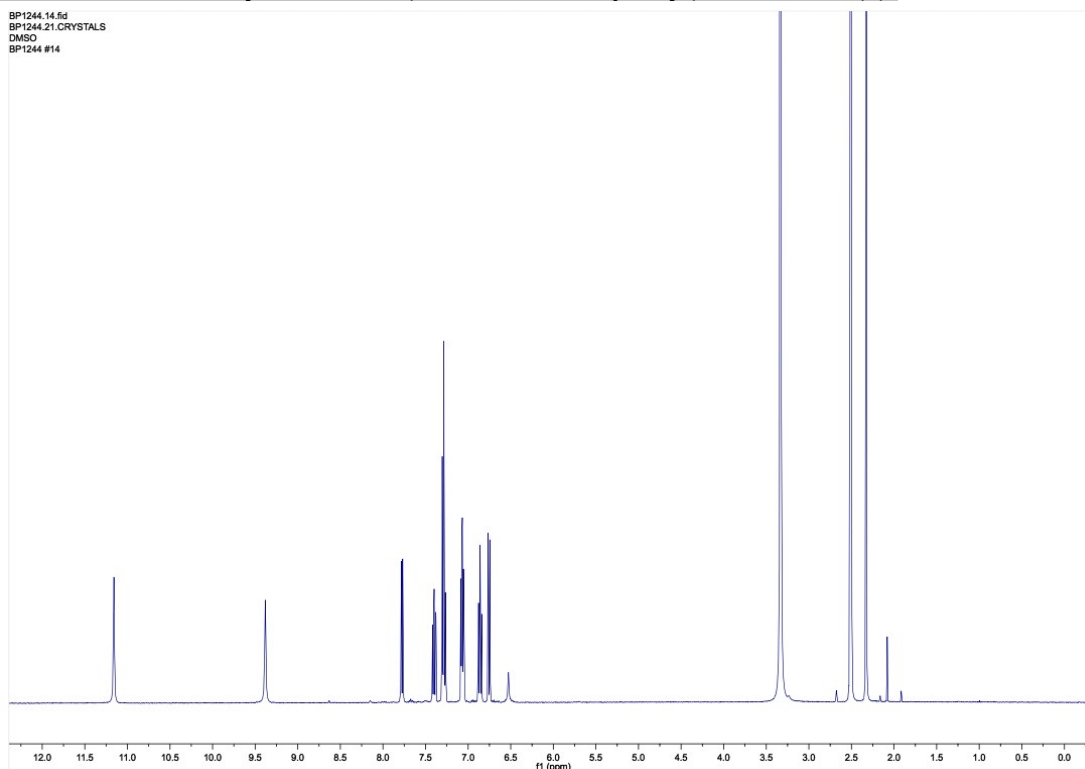

Salicylate ester of (2-(2-methoxyacetimidamido)phenyl)boronic acid (6):

Yield 60%. Clear crystalline solid;  $^1\text{H}$  NMR (400 MHz, DMSO):  $\delta$  2.51 (s, 3H,  $\text{CH}_3$ ) 2.83 (t,  $J = 6.2$  Hz, 2H,  $\text{CH}_2$ ), 3.71 (t,  $J = 6.2$  Hz, 2H,  $\text{CH}_2$ ), 6.76 (dd,  $J = 8.2, 1.0$  Hz, 1H, ArH), 6.86 (td,  $J = 7.5, 1.1$  Hz, 1H, ArH), 7.10 (m, 2H, ArH), 7.28 (dd,  $J = 7.5, 1.4$  Hz, 2H, ArH), 7.40 (ddd,  $J = 8.3, 7.2, 1.9$  Hz, 1H, ArH), 7.78 (dd,  $J = 7.8, 1.8$  Hz, 1H, ArH), 9.40 (s, 1H, NH), 11.17 (s, 1H, C=NH) ppm.  $^{13}\text{C}$  NMR (100 MHz, DMSO solution):  $\delta$  34.0, 58.4, 69.5, 115.3, 116.4, 118.7, 118.9, 125.1, 128.3, 129.8, 131.8, 135.0, 137.8, 159.8, 160.2, 163.6 ppm. ESMS ( $m/z$ ) [ $\text{M} + \text{Na}^+$ ] observed 346.5, calculated [ $\text{C}_{17}\text{H}_{17}\text{BN}_2\text{NaO}_4^+$ ] 347.1. Boron isotopes  $^{10}\text{B}$  20.7% and  $^{11}\text{B}$  79.3%.

Crystal data for  $\text{C}_{17}\text{H}_{17}\text{BN}_2\text{O}_4$  (1122th23):  $M = 324.13$  monoclinic, space group  $\text{P}2_1/\text{c}$ ,  $a = 14.4042(11)$ ,  $b = 9.165(5)$ ,  $c = 13.2350(9)$  Å,  $\beta = 113.504(8)^\circ$ ,  $U = 1602.2(2)$  Å $^3$ ,  $Z = 4$ ,  $D_c = 1.34$  g cm $^{-3}$ ,  $\mu = 0.095$  mm $^{-1}$ , Crystal size: 0.52 x 0.27 x 0.22 mm.  $T_{\text{min/max}} = 0.98, 1.00$ . 10442 reflections collected, 4470 unique ( $R_{\text{int}} = 0.029$ )  $R = 0.049$  [3341 reflections with  $I > 2s(I)$ ],  $wR^2 = 0.152$  (all data). CCDC#1848685. IUPAC name: 2-methoxy-*N*-(2-(4-oxo-4H-benzo[d][1,3,2]dioxaborinin-2-yl)phenyl)acetimidamide.

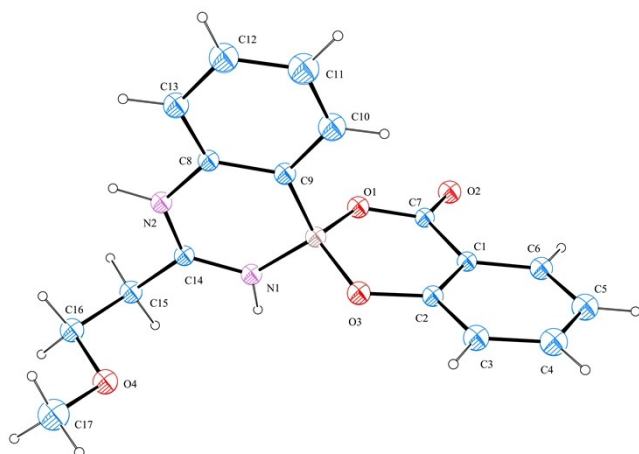

# Proton- and C13-NMR of **6**:

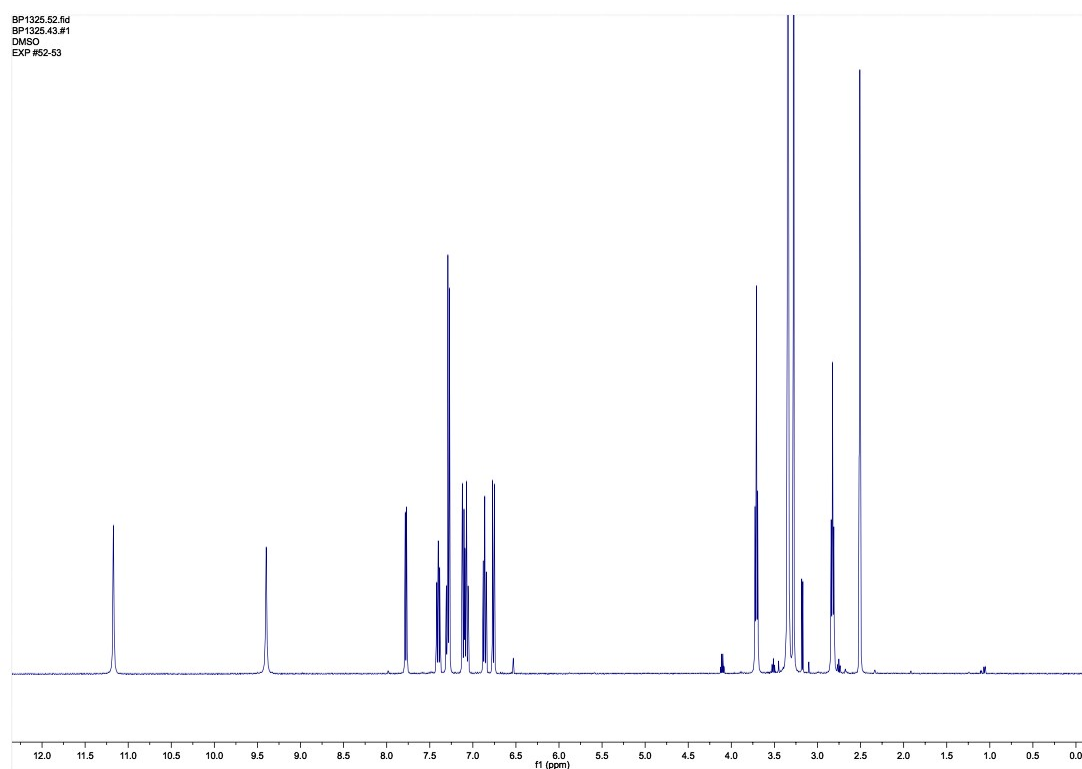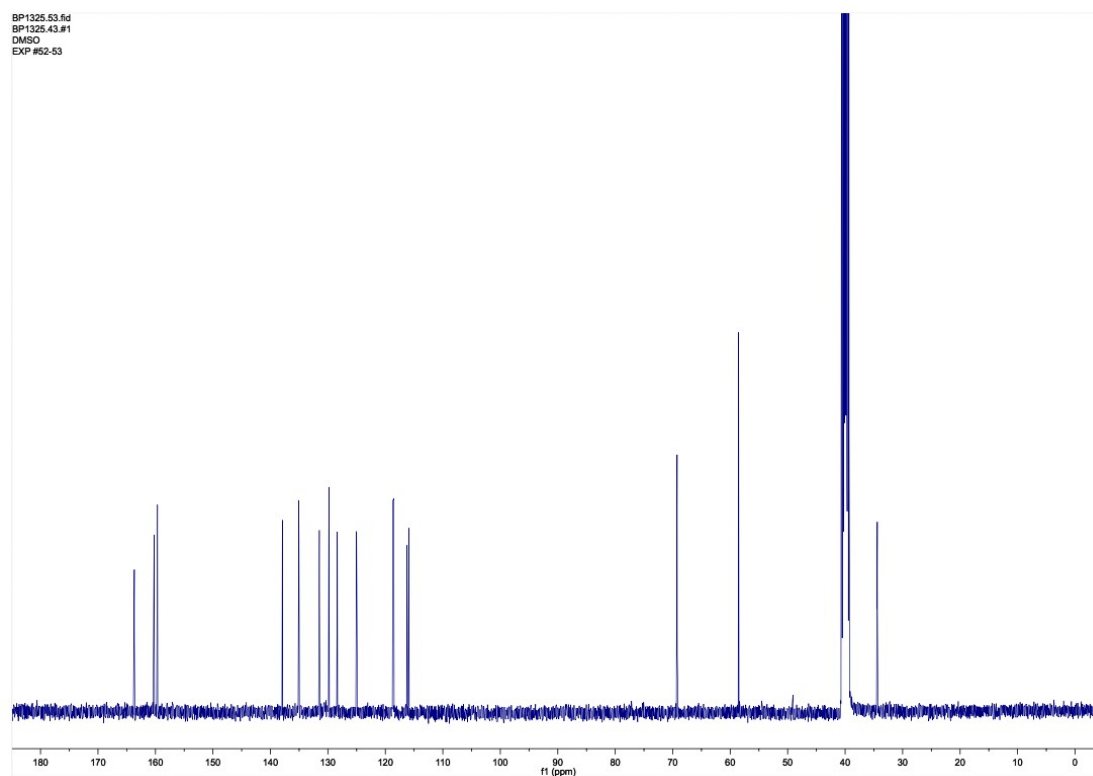

Salicylate ester of (2-(2-bromoacetimidamido)phenyl)boronic acid (7):

Yield 95%. Clear crystalline solid;  $^1\text{H}$  NMR (400 MHz, DMSO solution):  $\delta$  4.42 (s, 2H,  $\text{CH}_2$ ), 6.75 (d,  $J = 8.2$  Hz, 1H, CH), 6.86 (t,  $J = 7.4$  Hz, 1H, ArH), 7.08 (td,  $J = 7.0, 1.6$  Hz, 1H, ArH), 7.30 (m, 3H, ArH), 7.39 (m, 2H, ArH), 7.77 (dd,  $J = 7.7, 1.9$  Hz, 1H, ArH), 9.08 (s, 1H, NH), 11.04 (s, 1H, C=NH) ppm.  $^{13}\text{C}$  NMR (100 MHz, DMSO solution):  $\delta$ : 59.8, 116.2, 117.7, 118.9, 125.6, 128.3, 129.9, 131.8, 135.2, 137.8, 156.8, 160.2, 161.4, 163.6 ppm. HRMS ( $m/z$ ) [ $\text{M} + \text{H}^+$ ] observed 359.0198/361.0178, calculated  $[\text{C}_{15}\text{H}_{13}\text{BBrN}_2\text{O}_3]^+$  359.0203/361.0182. IUPAC name: 2-bromo-*N*-(2-(4-oxo-4H-benzo[d][1,3,2]dioxaborinin-2-yl)phenyl)acetimidamide.

Proton- and DEPT C13-NMR of 7:

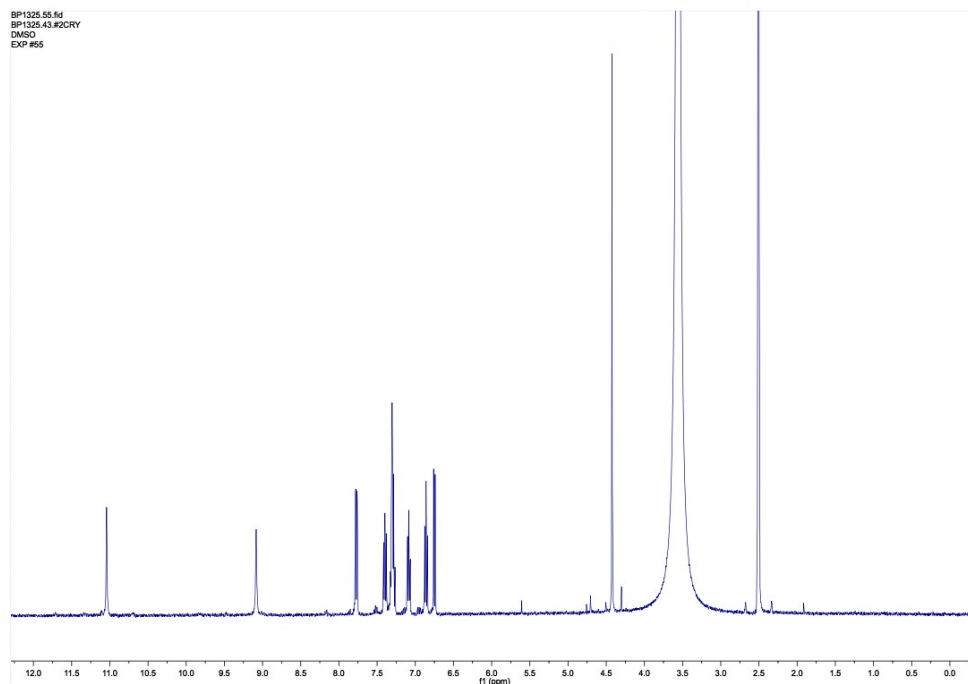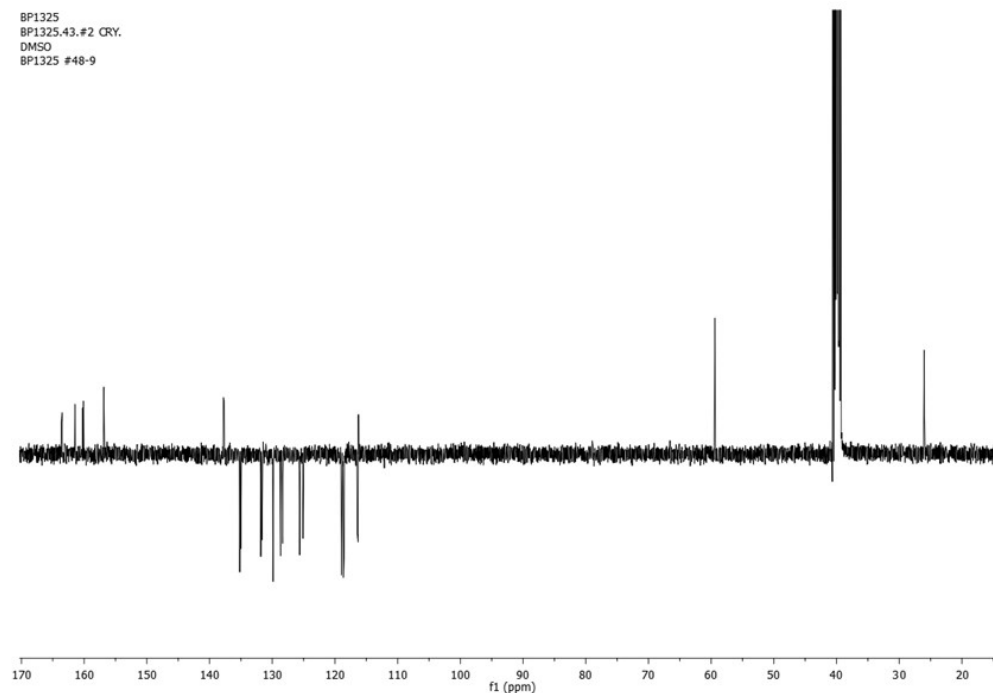

(E)-5H-dibenzo[c,h][1,5,7,2,10]oxadiazadiborecine-5,7(12H)-diol (**10**):

A solution of **1** (117.7 mg, 0.8 mmol), catechol (85.9 mg, 0.8 mmol) and 3-phenyl-2-propynenitrile (100.0 mg, 0.8 mmol) in DMF (4 mL) was heated at 338 K for 5 hours. At this time no product had been produced via TLC (DCM:MeOH, 10:1) so the reaction mixture was increased to 383 K for 2 hours and monitored via TLC (DCM:MeOH, 10:1,  $R_f$  = 0.08) indicating the formation of a single product. The reaction mixture was concentrated *in vacuo* to yield **10** as a white solid.

$^1\text{H}$  NMR (400 MHz, DMSO solution):  $\delta$  2.57 (s, 1H, CH), 7.05 (m, 1H, ArH), 7.11 (td,  $J$  = 7.2, 1.2 Hz, 1H, ArH), 7.20 (dtd,  $J$  = 11.4, 7.4, 1.3 Hz, 2H, ArH), 7.47 (td,  $J$  = 7.6, 1.6 Hz, 1H, ArH), 7.56 (m, 1H, ArH), 7.60 (d,  $J$  = 8.7 Hz, 1H, ArH), 7.70 (dd,  $J$  = 7.3, 1.6 Hz, 1H, ArH), 8.42 (s, 1H, NH) ppm.  $^{13}\text{C}$  NMR (100 MHz, DMSO solution):  $\delta$  115.6, 118.2, 124.7, 125.1, 126.8, 131.4, 132.8, 134.0, 137.2, 145.9, 147.8 ppm.

This material was dissolved in MeOH and cooled to produce flat disk-like crystals of **15** (~20 mg, 9%) that were suitable for analysis by X-ray crystallographic techniques.

ESMS ( $m/z$ ) [ $\text{M}-\text{H}^+$ ] observed 292.4, calculated [ $\text{C}_{15}\text{H}_{15}\text{B}_2\text{N}_2\text{O}_3$ ] 292.92.

Crystal data for  $\text{C}_{15}\text{H}_{16}\text{B}_2\text{N}_2\text{O}_3$  (1113th20):  $M = 293.9$ , monoclinic, space group  $\text{P}2_1/\text{c}$ ,  $a = 11.3834(13)$ ,  $b = 10.8026(9)$ ,  $c = 12.7677(10)$  Å,  $\beta = 103.589(10)^\circ$ ,  $U = 1526.1(3)$  Å<sup>3</sup>,  $Z = 4$ ,  $D_c = 1.33$  g cm<sup>-3</sup>,  $\mu = 0.087$  mm<sup>-1</sup>, Crystal size: 0.24 x 0.19 x 0.10 mm.  $T_{\text{min/max}} = 0.11, 1.00$ . 6288 reflections collected, 4066 unique ( $R_{\text{int}} = 0.064$ ),  $R = 0.081$  [2170 reflections with  $I > 2\sigma(I)$ ],  $wR^2 = 0.217$  (all data). CCDC#1848683. IUPAC name: (E)-5,7-dimethoxy-7,12-dihydro-5H-dibenzo[c,h][1,5,7,2,10]oxadiazadiborecine.

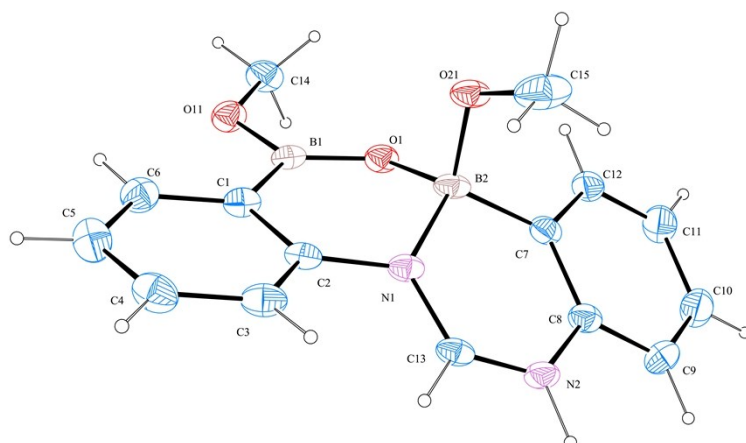

Proton- and C13-NMR spectra of **10**:

BP1244  
BP1244.83.1.DMFCRYSTALS  
DMSO  
EXP#118-119

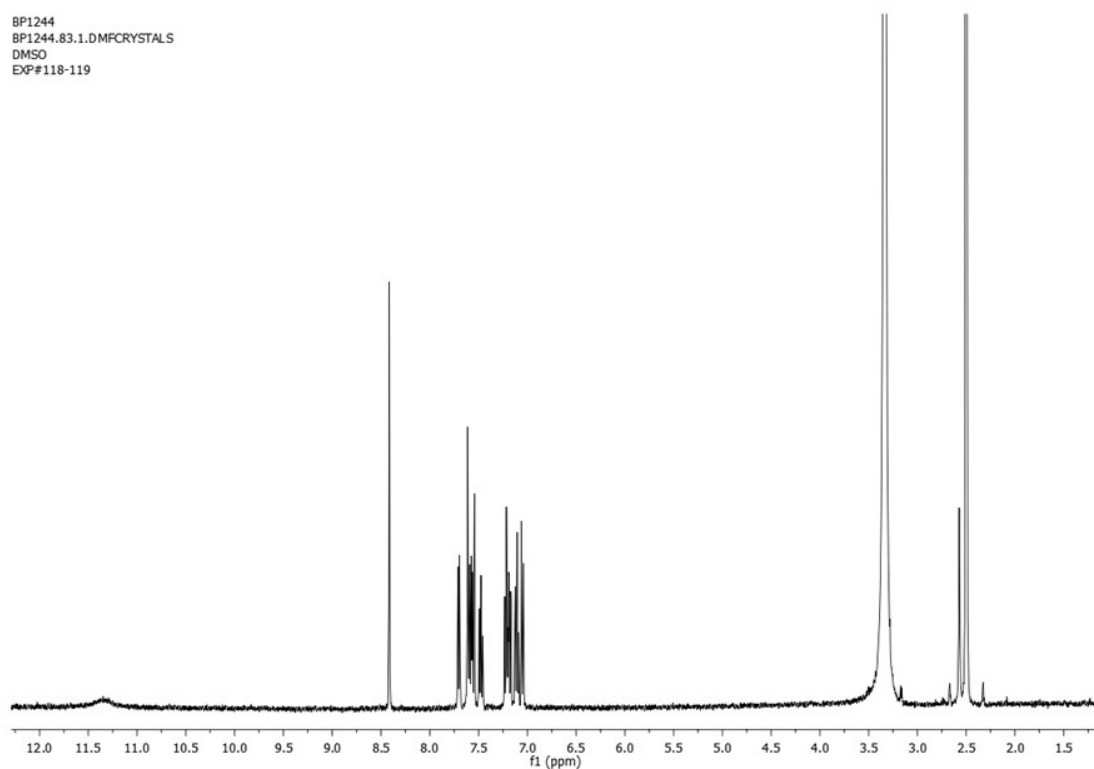

BP1244  
BP1244.83.1.DMFCRYSTALS  
DMSO  
EXP#118-119

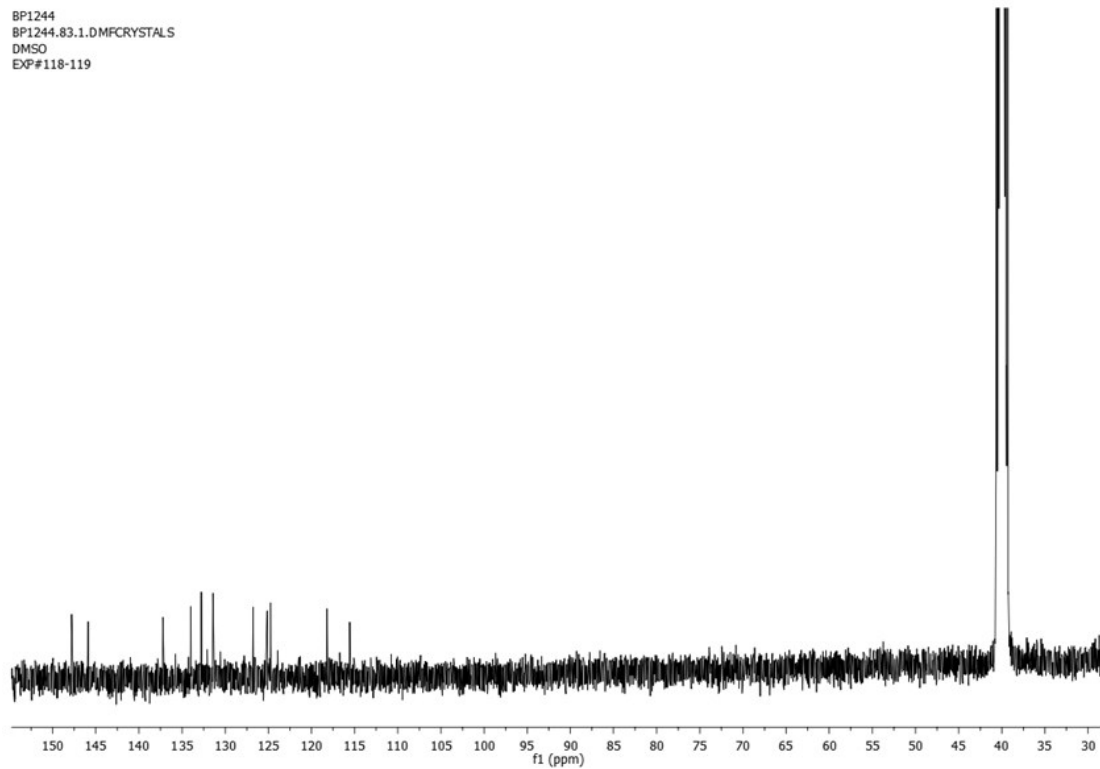

Supplement: c8ob02696c1.pdf [file c8ob02696c1.pdf]
